# Supplementary material for: Quantitative kinetics for the atmospheric reactions of Criegee intermediates with acetonitrile
Source: Royal Society of Chemistry journal article supplement (doi:10.1039/d2cp02849b), 2022-01-01
Supplement: d2cp02849b1.pdf [file d2cp02849b1.pdf]

ELECTRONIC SUPPORTING INFORMATION

**Quantitative kinetics for the atmospheric reactions of Criegee intermediates with  
acetonitrile**

Yu-Qiong Zhang,<sup>a,b</sup> Yu Xia,<sup>a</sup> Bo Long<sup>\*a,b</sup>

<sup>a</sup>College of Mechanical and Electrical Engineering, Guizhou Minzu University, Guiyang  
550025, China

<sup>b</sup>College of Materials Science and Engineering, Guizhou Minzu university, Guiyang  
550025, China

TABLE OF CONTENTS

|                                                                                                                                 |      |
|---------------------------------------------------------------------------------------------------------------------------------|------|
| Computational details for pressure-dependent rate constants of R1.                                                              | S-3  |
| Computational details for high-pressure-limit rate constants of R1, R2 and R3.                                                  | S-3  |
| Table S1. Scale factors applied to vibrational frequencies.                                                                     | S-4  |
| Table S2. Mean unsigned deviations of classical barrier heights and classical<br>reaction energies.                             | S-4  |
| Table S3. Mean unsigned deviations of relative zero-point vibrational energies.                                                 | S-4  |
| Table S4. The relative enthalpies at 0 K for the R1 reaction at different methods.                                              | S-5  |
| Table S5. High-pressure-limit rate constant $k_1$ and transmission coefficients,<br>and activation energies of the R1 reaction. | S-5  |
| Table S6. High-pressure-limit rate constant $k_2$ and transmission coefficients<br>for the R2 reaction.                         | S-6  |
| Table S7. High-pressure-limit rate constant $k_3$ and transmission coefficients<br>for the R3 reaction.                         | S-7  |
| Table S8. Parameters used to fit high-pressure limit rate constant $k_1$ , $k_2$ and $k_3$ .                                    | S-7  |
| Table S9. Pressure-dependent $k_1(T, p)$ of the R1 as a function of temperature<br>and pressure by SS-QRRK theory.              | S-8  |
| Table S10. The rate ratio between OH + CH <sub>3</sub> CN and R1 for various concentrations.                                    | S-9  |
| Table S11. The rate ratio between OH + CH <sub>3</sub> CN and R2 for various concentrations.                                    | S-10 |
| Table S12. Frequencies and zero-point vibrational energies for R1 reaction.                                                     | S-11 |
| Table S13. Frequencies and zero-point vibrational energies for R2 reaction.                                                     | S-15 |
| Table S14. Frequencies and zero-point vibrational energies for R3 reaction.                                                     | S-18 |
| Table S15. Cartesian coordinates and absolute energies for R1 reaction.                                                         | S-21 |
| Table S16. Cartesian coordinates (Å) and absolute energies for R2 reaction.                                                     | S-25 |
| Table S17. Cartesian coordinates (Å) and absolute energies for R3 reaction.                                                     | S-27 |

\*corresponding author, E-mail: [longbo@gzmu.edu.cn](mailto:longbo@gzmu.edu.cn)(Bo Long)

---

|                                                                                                                                      |      |
|--------------------------------------------------------------------------------------------------------------------------------------|------|
| Table S18. The reaction classic energy barrier for R1, R2 and R3 reactions.                                                          | S-28 |
| Figure S1. The enthalpies profile of the M2 isomerization channels for R2 reaction.                                                  | S-29 |
| Figure S2. Optimized M11-L/MG3S geometries for the R1 and R2 reactions<br>of the acetonitrile addition to the Criegee intermediates. | S-30 |

### Computational details for pressure-dependent rate constants of R1.

For the R1 reaction, we calculate the pressure-dependent rate constants using system-specific quantum Rice-Ramsperger-Kassel (SS-QRRK).<sup>1,2,3</sup> The  $F_E$  is computed based on the numerically integrated Whitten-Rabinovitch approximation.<sup>4</sup> The collision efficiency is computed based on the exponential gap model (also called the exponential down model), with the energy transfer parameter  $\langle \Delta E \rangle_{\text{down}} = 200 \text{ cm}^{-1}$ .

The van der Waals parameters used to calculate the collision rates are as follows:

| molecules               | $\sigma$ (in Å) | $\varepsilon$ (in K) | Reference |
|-------------------------|-----------------|----------------------|-----------|
| N <sub>2</sub> bath gas | 3.74            | 82                   | 5         |
| CH <sub>2</sub> OO      | 3.79            | 520                  | 6         |
| CH <sub>3</sub> CN      | 4.37            | 491.6                | 7         |
| M1 <sup>a</sup>         | 4.08            | 505.6                |           |

<sup>a</sup>Where van der Waals parameters of M1 is obtained by fitting the following two formulas:

$$\sigma = \frac{\sigma_1 \sigma_2}{2} \quad (1) \quad \varepsilon = \sqrt{\varepsilon_1 \varepsilon_2} \quad (2)$$

$\sigma$  is the hard-core diameter, and  $\varepsilon$  is a measure of the strength of the spherically symmetric part of the perturbation.

### TST for high-pressure-limit rate constants of R1, R2 and R3.

Title reactions can be expressed as:

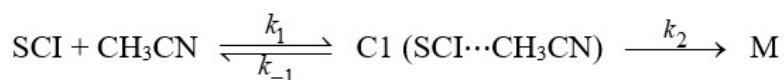

Where C1 is a pre-reactive complex and M is the products of these reactions. By the Steady-State Approximation, as well as introducing the assumption of  $k_2 \ll k_{-1}$ , we can get an expression for the rate constants:

$$\frac{d[\text{SCI}\cdots\text{CH}_3\text{CN}]}{dt} = k_1[\text{SCI}][\text{CH}_3\text{CN}] - k_{-1}[\text{SCI}\cdots\text{CH}_3\text{CN}] - k_2[\text{SCI}\cdots\text{CH}_3\text{CN}] = 0$$

$$[\text{SCI}\cdots\text{CH}_3\text{CN}] = \frac{k_1}{k_{-1} + k_2} [\text{SCI}][\text{CH}_3\text{CN}] \approx \frac{k_1}{k_{-1}} [\text{SCI}][\text{CH}_3\text{CN}]$$

$$\frac{d[\text{M}]}{dt} = k_2 [\text{SCI}\cdots\text{CH}_3\text{CN}] = k_2 \frac{k_1}{k_{-1}} [\text{SCI}][\text{CH}_3\text{CN}] = k_2 K_c [\text{SCI}][\text{CH}_3\text{CN}]$$

finally, the total rate constant is expressed as:

$$k = \frac{k_1 k_2}{k_{-1} + k_2} \approx \frac{k_1}{k_{-1}} k_2 = K_c k_2$$

Then, we using conventional transition state theory to predict rate constants and equilibrium constants, they can express as:

$$K_c(T) = \sigma \frac{Q_{C1}(T)}{Q_{SCI}(T) Q_{NH_3}(T)} \exp\left(-\frac{E_{C1}}{k_B T}\right) \quad (3)$$

$$k_2(T) = \kappa \frac{k_B T Q_{TS}(T)}{h Q_{C1}(T)} \exp\left(-\frac{E_a}{k_B T}\right) \quad (4)$$

$$k(T) = \sigma \kappa \frac{k_B T Q_{TS}(T)}{h Q_{SCI}(T) Q_{NH_3}(T)} \exp\left(-\frac{E_a + E_{C1}}{k_B T}\right) \quad (5)$$

where  $k_B$  is Boltzmann's constant,  $T$  is the temperature in K,  $h$  is Planck's constant,  $\kappa$  is the transmission coefficient, and  $\sigma$  is symmetry factor.

Table S1. Scale factors applied to vibrational frequencies

| Methods                     | Scale Factor |
|-----------------------------|--------------|
| CCSD(T)-F12a/cc-pVTZ-F12    | 0.984        |
| CCSD(T)-F12a/cc-pVDZ-F12    | 0.983        |
| DF-CCSD(T)-F12b/jun-cc-pVTZ | 0.983        |
| DF-CCSD(T)-F12b/jun-cc-pVDZ | 0.981        |
| M06CR/MG3S                  | 0.980        |
| MN15-L/MG3S                 | 0.977        |
| M11-L/MG3S                  | 0.985        |

Table S2. Mean unsigned deviations of classical barrier heights and classical reaction energies (in kcal/mol)

| Methods                          | $(\Delta V)$ |       |        | MUD  |
|----------------------------------|--------------|-------|--------|------|
|                                  | C1           | TS1   | M1     |      |
| W2X//CCSD(T)-F12a/cc-pVTZ-F12    | -8.29        | -3.29 | -56.59 | 0.00 |
| W2X//CCSD(T)-F12a/cc-pVDZ-F12    | -8.29        | -3.29 | -56.59 | 0.00 |
| W2X//DF-CCSD(T)-F12b/jun-cc-pVDZ | -8.26        | -3.28 | -56.73 | 0.06 |

Table S3. Mean unsigned deviations of relative zero-point vibrational energies for R1 (in kcal/mol)

| Methods                     | $(\Delta E_{ZPE})$ |      |      | MUD  |
|-----------------------------|--------------------|------|------|------|
|                             | C1                 | TS1  | M1   |      |
| CCSD(T)-F12a/cc-pVTZ-F12    | 1.24               | 2.35 | 5.10 | 0.00 |
| DF-CCSD(T)-F12b/jun-cc-pVDZ | 1.23               | 2.36 | 5.22 | 0.05 |
| CCSD(T)-F12a/cc-pVDZ-F12    | 1.28               | 2.21 | 5.14 | 0.07 |

Table S4. The relative enthalpies at 0 K for the  $\text{CH}_2\text{OO} + \text{CH}_3\text{CN}$  reaction at different methods.

| Methods                          | $\Delta H_0$ |       |        | MUD  |
|----------------------------------|--------------|-------|--------|------|
|                                  | C1           | TS1   | M1     |      |
| W2X//CCSD(T)-F12a/cc-pVTZ-F12    | -7.05        | -0.94 | -51.49 | 0.00 |
| W2X//DF-CCSD(T)-F12b/jun-cc-pVDZ | -7.03        | -0.92 | -51.51 | 0.02 |
| W2X//CCSD(T)-F12a/cc-pVDZ-F12    | -7.01        | -1.08 | -51.45 | 0.07 |

Table S5. High-pressure-limit rate constant  $k_1$  ( $\text{cm}^3 \text{ molecule}^{-1} \text{ s}^{-1}$ ) and transmission coefficients (unitless), and activation energies (in kcal/mol) for the R1 reaction.

| $T(\text{K})$ | $k_{HL}^{TST}$ <sup>a</sup> | $\Gamma_{LL}$ <sup>b</sup> | $k_{LL}^{SCT}$ <sup>c</sup> | $\Gamma_{LL}k_{LL}^{SCT}$ | $k_1$ <sup>c</sup>     | $E_{a1}$ <sup>d</sup> |
|---------------|-----------------------------|----------------------------|-----------------------------|---------------------------|------------------------|-----------------------|
| 190           | $1.51 \times 10^{-14}$      | 0.95                       | 1.35                        | 1.29                      | $1.94 \times 10^{-14}$ | -0.71                 |
| 200           | $1.42 \times 10^{-14}$      | 0.95                       | 1.31                        | 1.25                      | $1.77 \times 10^{-14}$ | -0.67                 |
| 210           | $1.35 \times 10^{-14}$      | 0.95                       | 1.28                        | 1.21                      | $1.63 \times 10^{-14}$ | -0.64                 |
| 220           | $1.29 \times 10^{-14}$      | 0.95                       | 1.25                        | 1.18                      | $1.53 \times 10^{-14}$ | -0.60                 |
| 230           | $1.24 \times 10^{-14}$      | 0.95                       | 1.22                        | 1.16                      | $1.44 \times 10^{-14}$ | -0.56                 |
| 240           | $1.21 \times 10^{-14}$      | 0.95                       | 1.20                        | 1.14                      | $1.37 \times 10^{-14}$ | -0.52                 |
| 250           | $1.17 \times 10^{-14}$      | 0.95                       | 1.18                        | 1.12                      | $1.32 \times 10^{-14}$ | -0.48                 |
| 260           | $1.15 \times 10^{-14}$      | 0.95                       | 1.17                        | 1.11                      | $1.27 \times 10^{-14}$ | -0.44                 |
| 270           | $1.13 \times 10^{-14}$      | 0.94                       | 1.16                        | 1.09                      | $1.23 \times 10^{-14}$ | -0.40                 |
| 280           | $1.11 \times 10^{-14}$      | 0.94                       | 1.14                        | 1.08                      | $1.20 \times 10^{-14}$ | -0.36                 |
| 290           | $1.10 \times 10^{-14}$      | 0.94                       | 1.13                        | 1.07                      | $1.18 \times 10^{-14}$ | -0.31                 |
| 298           | $1.10 \times 10^{-14}$      | 0.94                       | 1.13                        | 1.06                      | $1.16 \times 10^{-14}$ | -0.28                 |
| 300           | $1.09 \times 10^{-14}$      | 0.94                       | 1.12                        | 1.06                      | $1.16 \times 10^{-14}$ | -0.27                 |
| 310           | $1.09 \times 10^{-14}$      | 0.94                       | 1.12                        | 1.05                      | $1.14 \times 10^{-14}$ | -0.24                 |
| 320           | $1.09 \times 10^{-14}$      | 0.94                       | 1.11                        | 1.04                      | $1.13 \times 10^{-14}$ | -0.20                 |
| 330           | $1.09 \times 10^{-14}$      | 0.94                       | 1.10                        | 1.03                      | $1.12 \times 10^{-14}$ | -0.16                 |
| 340           | $1.09 \times 10^{-14}$      | 0.94                       | 1.09                        | 1.02                      | $1.11 \times 10^{-14}$ | -0.12                 |

|     |                        |      |      |      |                        |       |
|-----|------------------------|------|------|------|------------------------|-------|
| 350 | $1.09 \times 10^{-14}$ | 0.93 | 1.09 | 1.02 | $1.11 \times 10^{-14}$ | -0.09 |
|-----|------------------------|------|------|------|------------------------|-------|

<sup>a</sup>  $k_{HL}^{TST}$  is the conventional transition state theory rate constant calculated with the high level.

<sup>b</sup> The  $\Gamma_{LL}$  is the LL recrossing transmission coefficient, which equals  $k_{LL}^{CVT}/k_{LL}^{TST}$ .

<sup>c</sup> The high-pressure limit rate constant  $k$  is calculated by the dual-level CVT/SCT method and  $k$  equals  $k_{HL}^{TST} \Gamma_{LL} k_{LL}^{SCT}$ .

<sup>d</sup>  $E_a$  is Arrhenius activation energies (kcal/mol) for the high-pressure limit, and which is

calculated as  $-\frac{d \ln k}{R d(1/T)}$  in the high-pressure limit from the dual-level CVT/SCT calculations.

<sup>e</sup> Where HL denote higher level with W3X-L//CCSD(T)-F12a/cc-pVTZ-F12 level, and LL denote lower level with M06CR/MG3S level.

Table S6. High-pressure-limit rate constants  $k_2$  ( $\text{cm}^3 \text{ molecule}^{-1} \text{ s}^{-1}$ ) and transmission coefficients (unitless), and activation energies (in kcal/mol) for the R2 reaction.

| $T(\text{K})$ | $k_{HL}^{TST}$         | $\Gamma_{LL}$ | $k_{LL}^{SCT}$ | $\Gamma_{LL} k_{LL}^{SCT}$ | $k_2$                  | $E_{a2}$ |
|---------------|------------------------|---------------|----------------|----------------------------|------------------------|----------|
| 190           | $1.54 \times 10^{-13}$ | 0.96          | 1.64           | 1.58                       | $2.43 \times 10^{-13}$ | -2.04    |
| 200           | $1.25 \times 10^{-13}$ | 0.96          | 1.56           | 1.50                       | $1.88 \times 10^{-13}$ | -1.95    |
| 210           | $1.04 \times 10^{-13}$ | 0.96          | 1.49           | 1.43                       | $1.50 \times 10^{-13}$ | -1.87    |
| 220           | $8.87 \times 10^{-14}$ | 0.96          | 1.44           | 1.38                       | $1.22 \times 10^{-13}$ | -1.81    |
| 230           | $7.67 \times 10^{-14}$ | 0.96          | 1.39           | 1.33                       | $1.02 \times 10^{-13}$ | -1.75    |
| 240           | $6.73 \times 10^{-14}$ | 0.96          | 1.35           | 1.30                       | $8.71 \times 10^{-14}$ | -1.70    |
| 250           | $5.98 \times 10^{-14}$ | 0.96          | 1.32           | 1.26                       | $7.55 \times 10^{-14}$ | -1.65    |
| 260           | $5.38 \times 10^{-14}$ | 0.96          | 1.29           | 1.23                       | $6.64 \times 10^{-14}$ | -1.61    |
| 270           | $4.89 \times 10^{-14}$ | 0.96          | 1.26           | 1.21                       | $5.91 \times 10^{-14}$ | -1.58    |
| 280           | $4.49 \times 10^{-14}$ | 0.96          | 1.24           | 1.19                       | $5.33 \times 10^{-14}$ | -1.55    |
| 290           | $4.15 \times 10^{-14}$ | 0.96          | 1.22           | 1.17                       | $4.85 \times 10^{-14}$ | -1.52    |
| 298           | $3.92 \times 10^{-14}$ | 0.95          | 1.21           | 1.16                       | $4.53 \times 10^{-14}$ | -1.50    |
| 300           | $3.87 \times 10^{-14}$ | 0.95          | 1.21           | 1.15                       | $4.45 \times 10^{-14}$ | -1.50    |
| 310           | $3.63 \times 10^{-14}$ | 0.95          | 1.19           | 1.14                       | $4.12 \times 10^{-14}$ | -1.48    |
| 320           | $3.42 \times 10^{-14}$ | 0.95          | 1.18           | 1.12                       | $3.84 \times 10^{-14}$ | -1.46    |
| 330           | $3.25 \times 10^{-14}$ | 0.95          | 1.17           | 1.11                       | $3.61 \times 10^{-14}$ | -1.45    |
| 340           | $3.10 \times 10^{-14}$ | 0.95          | 1.16           | 1.10                       | $3.41 \times 10^{-14}$ | -1.44    |

|     |                        |      |      |      |                        |       |
|-----|------------------------|------|------|------|------------------------|-------|
| 350 | $2.97 \times 10^{-14}$ | 0.95 | 1.15 | 1.09 | $3.23 \times 10^{-14}$ | -1.43 |
|-----|------------------------|------|------|------|------------------------|-------|

<sup>a</sup> It is worth noting that where HL denote higher level with W3X-L//DF-CCSD(T)-F12b/jun-cc-pVDZ level, and LL denote lower level with M11-L/MG3S level.

Table S7. High-pressure-limit rate constants  $k_3$  ( $\text{cm}^3 \text{ molecule}^{-1} \text{ s}^{-1}$ ) and transmission coefficients (unitless), and activation energies (in kcal/mol) for the R3 reaction.

| $T(\text{K})$ | $k_{HL}^{TST}$         | $\Gamma_{LL}$ | $k_{LL}^{SCT}$ | $\Gamma_{LL} k_{LL}^{SCT}$ | $k_3$                  | $E_{a3}$ |
|---------------|------------------------|---------------|----------------|----------------------------|------------------------|----------|
| 190           | $5.76 \times 10^{-20}$ | 0.96          | 1.73           | 1.67                       | $9.59 \times 10^{-20}$ | 3.60     |
| 200           | $9.87 \times 10^{-20}$ | 0.96          | 1.63           | 1.57                       | $1.55 \times 10^{-19}$ | 3.66     |
| 210           | $1.61 \times 10^{-19}$ | 0.96          | 1.55           | 1.49                       | $2.41 \times 10^{-19}$ | 3.72     |
| 220           | $2.53 \times 10^{-19}$ | 0.96          | 1.49           | 1.43                       | $3.62 \times 10^{-19}$ | 3.77     |
| 230           | $3.83 \times 10^{-19}$ | 0.96          | 1.44           | 1.38                       | $5.28 \times 10^{-19}$ | 3.83     |
| 240           | $5.62 \times 10^{-19}$ | 0.96          | 1.39           | 1.33                       | $7.51 \times 10^{-19}$ | 3.88     |
| 250           | $8.03 \times 10^{-19}$ | 0.96          | 1.35           | 1.30                       | $1.04 \times 10^{-18}$ | 3.93     |
| 260           | $1.12 \times 10^{-18}$ | 0.96          | 1.32           | 1.27                       | $1.41 \times 10^{-18}$ | 3.99     |
| 270           | $1.52 \times 10^{-18}$ | 0.96          | 1.29           | 1.24                       | $1.89 \times 10^{-18}$ | 4.04     |
| 280           | $2.04 \times 10^{-18}$ | 0.96          | 1.27           | 1.21                       | $2.47 \times 10^{-18}$ | 4.09     |
| 290           | $2.68 \times 10^{-18}$ | 0.96          | 1.25           | 1.19                       | $3.19 \times 10^{-18}$ | 4.14     |
| 298           | $3.29 \times 10^{-18}$ | 0.95          | 1.23           | 1.18                       | $3.87 \times 10^{-18}$ | 4.18     |
| 300           | $3.46 \times 10^{-18}$ | 0.95          | 1.23           | 1.17                       | $4.06 \times 10^{-18}$ | 4.19     |
| 310           | $4.41 \times 10^{-18}$ | 0.95          | 1.21           | 1.16                       | $5.10 \times 10^{-18}$ | 4.24     |
| 320           | $5.55 \times 10^{-18}$ | 0.95          | 1.20           | 1.14                       | $6.33 \times 10^{-18}$ | 4.29     |
| 330           | $6.90 \times 10^{-18}$ | 0.95          | 1.19           | 1.13                       | $7.78 \times 10^{-18}$ | 4.34     |
| 340           | $8.49 \times 10^{-18}$ | 0.95          | 1.17           | 1.11                       | $9.46 \times 10^{-18}$ | 4.39     |
| 350           | $1.03 \times 10^{-17}$ | 0.95          | 1.16           | 1.10                       | $1.14 \times 10^{-17}$ | 4.44     |

<sup>a</sup> Where HL denote higher level with W3X-L//DF-CCSD(T)-F12b/jun-cc-pVDZ level, and LL denote lower level with M11-L/MG3S level.

Table S8. Parameters used to fit high-pressure limit rate constants  $k_1$ ,  $k_2$  and  $k_3$  ( $\text{cm}^3 \text{molecule}^{-1} \text{s}^{-1}$ )

|       | A                      | n     | E    | $T_0$   |
|-------|------------------------|-------|------|---------|
| $k_1$ | $2.95 \times 10^{-14}$ | -0.02 | 1.45 | -152.07 |
| $k_2$ | $9.88 \times 10^{-14}$ | -1.82 | 1.69 | -107.90 |
| $k_3$ | $5.79 \times 10^{-16}$ | 2.22  | 3.04 | -8.27   |

Table S9. Pressure-dependent rate constants  $k_1(T, p)$  of the R1 as a function of temperature and pressure by system-specific quantum Rice-Ramsperger-Kassel (SS-QRRK) theory.

| $p$ (bar) | $T = 350 \text{ K}$    | $T = 330 \text{ K}$    | $T = 310 \text{ K}$    | $T = 298 \text{ K}$    |
|-----------|------------------------|------------------------|------------------------|------------------------|
| 0.0316    | $1.11 \times 10^{-14}$ | $1.12 \times 10^{-14}$ | $1.14 \times 10^{-14}$ | $1.16 \times 10^{-14}$ |
| 0.1       | $1.11 \times 10^{-14}$ | $1.12 \times 10^{-14}$ | $1.14 \times 10^{-14}$ | $1.16 \times 10^{-14}$ |
| 0.178     | $1.11 \times 10^{-14}$ | $1.12 \times 10^{-14}$ | $1.14 \times 10^{-14}$ | $1.16 \times 10^{-14}$ |
| 0.316     | $1.11 \times 10^{-14}$ | $1.12 \times 10^{-14}$ | $1.14 \times 10^{-14}$ | $1.16 \times 10^{-14}$ |
| 0.562     | $1.11 \times 10^{-14}$ | $1.12 \times 10^{-14}$ | $1.14 \times 10^{-14}$ | $1.16 \times 10^{-14}$ |
| 1         | $1.11 \times 10^{-14}$ | $1.12 \times 10^{-14}$ | $1.14 \times 10^{-14}$ | $1.16 \times 10^{-14}$ |
| 1.78      | $1.11 \times 10^{-14}$ | $1.12 \times 10^{-14}$ | $1.14 \times 10^{-14}$ | $1.16 \times 10^{-14}$ |
| 3.16      | $1.11 \times 10^{-14}$ | $1.12 \times 10^{-14}$ | $1.14 \times 10^{-14}$ | $1.16 \times 10^{-14}$ |
| 5.62      | $1.11 \times 10^{-14}$ | $1.12 \times 10^{-14}$ | $1.14 \times 10^{-14}$ | $1.16 \times 10^{-14}$ |
| 10        | $1.11 \times 10^{-14}$ | $1.12 \times 10^{-14}$ | $1.14 \times 10^{-14}$ | $1.16 \times 10^{-14}$ |
| 31.6      | $1.11 \times 10^{-14}$ | $1.12 \times 10^{-14}$ | $1.14 \times 10^{-14}$ | $1.16 \times 10^{-14}$ |
| 100       | $1.11 \times 10^{-14}$ | $1.12 \times 10^{-14}$ | $1.14 \times 10^{-14}$ | $1.16 \times 10^{-14}$ |
| 1000      | $1.11 \times 10^{-14}$ | $1.12 \times 10^{-14}$ | $1.14 \times 10^{-14}$ | $1.16 \times 10^{-14}$ |
| $p$ (bar) | $T = 290 \text{ K}$    | $T = 270 \text{ K}$    | $T = 250 \text{ K}$    | $T = 230 \text{ K}$    |
| 0.0316    | $1.18 \times 10^{-14}$ | $1.23 \times 10^{-14}$ | $1.32 \times 10^{-14}$ | $1.44 \times 10^{-14}$ |
| 0.1       | $1.18 \times 10^{-14}$ | $1.23 \times 10^{-14}$ | $1.32 \times 10^{-14}$ | $1.44 \times 10^{-14}$ |
| 0.178     | $1.18 \times 10^{-14}$ | $1.23 \times 10^{-14}$ | $1.32 \times 10^{-14}$ | $1.44 \times 10^{-14}$ |
| 0.316     | $1.18 \times 10^{-14}$ | $1.23 \times 10^{-14}$ | $1.32 \times 10^{-14}$ | $1.44 \times 10^{-14}$ |
| 0.562     | $1.18 \times 10^{-14}$ | $1.23 \times 10^{-14}$ | $1.32 \times 10^{-14}$ | $1.44 \times 10^{-14}$ |
| 1         | $1.18 \times 10^{-14}$ | $1.23 \times 10^{-14}$ | $1.32 \times 10^{-14}$ | $1.44 \times 10^{-14}$ |
| 1.78      | $1.18 \times 10^{-14}$ | $1.23 \times 10^{-14}$ | $1.32 \times 10^{-14}$ | $1.44 \times 10^{-14}$ |



|      |                        |                        |                        |                        |
|------|------------------------|------------------------|------------------------|------------------------|
| 3.16 | $1.18 \times 10^{-14}$ | $1.23 \times 10^{-14}$ | $1.32 \times 10^{-14}$ | $1.44 \times 10^{-14}$ |
| 5.62 | $1.18 \times 10^{-14}$ | $1.23 \times 10^{-14}$ | $1.32 \times 10^{-14}$ | $1.44 \times 10^{-14}$ |
| 10   | $1.18 \times 10^{-14}$ | $1.23 \times 10^{-14}$ | $1.32 \times 10^{-14}$ | $1.44 \times 10^{-14}$ |
| 31.6 | $1.18 \times 10^{-14}$ | $1.23 \times 10^{-14}$ | $1.32 \times 10^{-14}$ | $1.44 \times 10^{-14}$ |
| 100  | $1.18 \times 10^{-14}$ | $1.23 \times 10^{-14}$ | $1.32 \times 10^{-14}$ | $1.44 \times 10^{-14}$ |
| 1000 | $1.18 \times 10^{-14}$ | $1.23 \times 10^{-14}$ | $1.32 \times 10^{-14}$ | $1.44 \times 10^{-14}$ |

<sup>a</sup> For this table,  $k_1(T, p)$  is calculated by the SS-QRRK theory method. Here, the SS-QRRK calculations are carried out using the bimolecular association-reaction formula.

Table S10. The rate ratio between OH + CH<sub>3</sub>CN and CH<sub>2</sub>OO + CH<sub>3</sub>CN for various concentrations in molecules/cm<sup>3</sup>.

| T/K | $k_{OH}$               | $k_1^b$                | $v_1^a$                              |                      |                      |
|-----|------------------------|------------------------|--------------------------------------|----------------------|----------------------|
|     |                        |                        | [CH <sub>2</sub> OO]=10 <sup>5</sup> |                      |                      |
|     |                        |                        | [OH]=10 <sup>4</sup>                 | [OH]=10 <sup>5</sup> | [OH]=10 <sup>6</sup> |
| 250 | $1.08 \times 10^{-14}$ | $1.32 \times 10^{-14}$ | 12.22                                | 1.22                 | 0.12                 |
| 260 | $1.27 \times 10^{-14}$ | $1.27 \times 10^{-14}$ | 9.98                                 | 1.00                 | 0.10                 |
| 270 | $1.48 \times 10^{-14}$ | $1.23 \times 10^{-14}$ | 8.31                                 | 0.83                 | 0.08                 |
| 280 | $1.71 \times 10^{-14}$ | $1.20 \times 10^{-14}$ | 7.02                                 | 0.70                 | 0.07                 |
| 290 | $1.95 \times 10^{-14}$ | $1.18 \times 10^{-14}$ | 6.02                                 | 0.60                 | 0.06                 |
| 298 | $2.16 \times 10^{-14}$ | $1.16 \times 10^{-14}$ | 5.37                                 | 0.54                 | 0.05                 |
| 300 | $2.21 \times 10^{-14}$ | $1.16 \times 10^{-14}$ | 5.22                                 | 0.52                 | 0.05                 |
| 310 | $2.49 \times 10^{-14}$ | $1.14 \times 10^{-14}$ | 4.59                                 | 0.46                 | 0.05                 |
| 320 | $2.77 \times 10^{-14}$ | $1.13 \times 10^{-14}$ | 4.07                                 | 0.41                 | 0.04                 |
| 330 | $3.07 \times 10^{-14}$ | $1.12 \times 10^{-14}$ | 3.64                                 | 0.36                 | 0.04                 |
| 340 | $3.38 \times 10^{-14}$ | $1.11 \times 10^{-14}$ | 3.29                                 | 0.33                 | 0.03                 |
| 350 | $3.70 \times 10^{-14}$ | $1.11 \times 10^{-14}$ | 2.99                                 | 0.30                 | 0.03                 |

$$v_1^a = \frac{k_1[CH_2OO][CH_3CN]}{k_{OH}[OH][CH_3CN]} = \frac{k_1[CH_2OO]}{k_{OH}[OH]}, \text{ where } k_{OH} \text{ is the rate constant of OH + CH}_3\text{CN}$$

from the preferred values of Evaluated Kinetic and Photochemical Data for Atmospheric Chemistry: Supplement IV.  $k_{OH} = 8.1 \times 10^{-13} \exp(-1080/T) \text{ cm}^3 \text{ molecule}^{-1} \text{ s}^{-1}$ . (Journal of Physical and Chemical Reference Data 21, 1125 (1992)).

<sup>b</sup> The bimolecular rate constants of CH<sub>2</sub>OO + CH<sub>3</sub>CN (pressure-independent) are calculated in the present work by using the dual-level strategy.

Table S11. The rate ratio between OH + CH<sub>3</sub>CN and *anti*-CH<sub>3</sub>CHOO + CH<sub>3</sub>CN for various concentrations in molecules/cm<sup>3</sup>.

| T/K | $k_{OH}$               | $k_2^b$                | $v_2^a$                                              |                      |                      |
|-----|------------------------|------------------------|------------------------------------------------------|----------------------|----------------------|
|     |                        |                        | [ <i>anti</i> -CH <sub>3</sub> CHOO]=10 <sup>5</sup> |                      |                      |
|     |                        |                        | [OH]=10 <sup>4</sup>                                 | [OH]=10 <sup>5</sup> | [OH]=10 <sup>6</sup> |
| 250 | $1.08 \times 10^{-14}$ | $7.55 \times 10^{-14}$ | 70.08                                                | 7.01                 | 0.70                 |
| 260 | $1.27 \times 10^{-14}$ | $6.64 \times 10^{-14}$ | 52.21                                                | 5.22                 | 0.52                 |
| 270 | $1.48 \times 10^{-14}$ | $5.92 \times 10^{-14}$ | 39.88                                                | 3.99                 | 0.40                 |
| 280 | $1.71 \times 10^{-14}$ | $5.33 \times 10^{-14}$ | 31.15                                                | 3.11                 | 0.31                 |
| 290 | $1.95 \times 10^{-14}$ | $4.85 \times 10^{-14}$ | 24.81                                                | 2.48                 | 0.25                 |
| 298 | $2.16 \times 10^{-14}$ | $4.53 \times 10^{-14}$ | 20.96                                                | 2.10                 | 0.21                 |
| 300 | $2.21 \times 10^{-14}$ | $4.45 \times 10^{-14}$ | 20.13                                                | 2.01                 | 0.20                 |
| 310 | $2.49 \times 10^{-14}$ | $4.12 \times 10^{-14}$ | 16.59                                                | 1.66                 | 0.17                 |
| 320 | $2.77 \times 10^{-14}$ | $3.84 \times 10^{-14}$ | 13.87                                                | 1.39                 | 0.14                 |
| 330 | $3.07 \times 10^{-14}$ | $3.61 \times 10^{-14}$ | 11.75                                                | 1.18                 | 0.12                 |
| 340 | $3.38 \times 10^{-14}$ | $3.41 \times 10^{-14}$ | 10.08                                                | 1.01                 | 0.10                 |
| 350 | $3.70 \times 10^{-14}$ | $3.23 \times 10^{-14}$ | 8.73                                                 | 0.87                 | 0.09                 |

$v_2^a = \frac{k_2[\textit{anti} - \text{CH}_3\text{CHOO}][\text{CH}_3\text{CN}]}{k_{OH}[\text{OH}][\text{CH}_3\text{CN}]} = \frac{k_2[\textit{anti} - \text{CH}_3\text{CHOO}]}{k_{OH}[\text{OH}]}$ , where  $k_{OH}$  is the rate constant of OH + CH<sub>3</sub>CN from the preferred values of Evaluated Kinetic and Photochemical Data for Atmospheric Chemistry: Supplement IV.  $k_{OH} = 8.1 \times 10^{-13} \exp(-1080/T) \text{ cm}^3 \text{ molecule}^{-1} \text{ s}^{-1}$ . (Journal of Physical and Chemical Reference Data 21, 1125 (1992)).

<sup>b</sup> The bimolecular rate constants of *anti*-CH<sub>3</sub>CHOO + CH<sub>3</sub>CN are calculated in the present work by using the dual-level strategy.

Table S12. Frequencies and zero-point vibrational energies for R1 path.

(a) CH<sub>2</sub>OO

| Methods                     | ZPE(kcal/mol) | Frequencies (cm <sup>-1</sup> ) |         |         |
|-----------------------------|---------------|---------------------------------|---------|---------|
| CCSD(T)-F12a/cc-pVTZ-F12    | 19.27         | 535.36                          | 637.03  | 869.95  |
|                             |               | 951.74                          | 1239.56 | 1314.85 |
|                             |               | 1488.18                         | 3139.81 | 3302.70 |
| CCSD(T)-F12a/cc-pVDZ-F12    | 19.23         | 534.12                          | 628.58  | 860.08  |
|                             |               | 950.85                          | 1237.42 | 1307.55 |
|                             |               | 1486.38                         | 3140.72 | 3304.76 |
| DF-CCSD(T)-F12b/jun-cc-pVDZ | 19.22         | 535.46                          | 632.71  | 837.62  |
|                             |               | 913.08                          | 1224.03 | 1313.63 |
|                             |               | 1477.68                         | 3169.35 | 3340.94 |
| M06CR/MG3S                  | 19.37         | 549.95                          | 705.40  | 949.47  |
|                             |               | 1008.64                         | 1247.02 | 1401.47 |
|                             |               | 1562.70                         | 3121.80 | 3282.74 |
| M11-L/MG3S                  | 19.00         | 538.79                          | 680.05  | 890.58  |
|                             |               | 1005.57                         | 1240.77 | 1371.45 |
|                             |               | 1546.21                         | 3020.85 | 3197.17 |
| MN15-L/MG3S                 | 19.14         | 535.78                          | 683.96  | 936.49  |
|                             |               | 968.15                          | 1251.56 | 1408.29 |
|                             |               | 1550.10                         | 3103.81 | 3265.72 |

(b) CH<sub>3</sub>CN.

| Methods | ZPE(kcal/mol) | Frequencies (cm <sup>-1</sup> ) |
|---------|---------------|---------------------------------|
|---------|---------------|---------------------------------|

|                             |       |                                         |                                         |                                         |
|-----------------------------|-------|-----------------------------------------|-----------------------------------------|-----------------------------------------|
| CCSD(T)-F12a/cc-pVTZ-F12    | 28.36 | 361.26<br>1061.99<br>1486.26<br>3066.02 | 361.66<br>1062.01<br>1486.50<br>3152.36 | 924.09<br>1415.65<br>2306.28<br>3152.36 |
| CCSD(T)-F12a/cc-pVDZ-F12    | 28.39 | 361.68<br>1064.05<br>1490.44<br>3069.46 | 361.94<br>1064.32<br>1490.44<br>3154.68 | 922.38<br>1418.82<br>2304.59<br>3154.91 |
| DF-CCSD(T)-F12b/jun-cc-pVDZ | 28.44 | 347.61<br>1053.46<br>1474.70<br>3095.27 | 347.62<br>1053.47<br>1474.77<br>3195.64 | 935.36<br>1403.68<br>2314.75<br>3195.71 |
| M06CR/MG3S                  | 27.86 | 392.78<br>1036.22<br>1452.75<br>3072.19 | 392.78<br>1036.22<br>1452.75<br>3156.70 | 954.33<br>1382.64<br>2400.67<br>3156.70 |
| M11-L/MG3S                  | 27.65 | 393.22<br>1032.93<br>1432.47<br>2992.40 | 393.22<br>1032.93<br>1432.47<br>3106.36 | 954.26<br>1373.35<br>2382.67<br>3106.36 |
| MN15-L/MG3S                 | 27.72 | 391.85<br>1051.24<br>1472.64<br>3042.77 | 391.85<br>1051.24<br>1472.64<br>3132.83 | 942.74<br>1401.00<br>2361.84<br>3132.83 |

## (c) TS1.

| Methods                  | ZPE(kcal/mol) | Frequencies (cm <sup>-1</sup> )                                                             |                                                                                             |                                                                                              |
|--------------------------|---------------|---------------------------------------------------------------------------------------------|---------------------------------------------------------------------------------------------|----------------------------------------------------------------------------------------------|
| CCSD(T)-F12a/cc-pVTZ-F12 | 50.02         | 142.08<br>298.02<br>474.79<br>921.24<br>1066.01<br>1356.97<br>1482.41<br>3063.16<br>3159.20 | 156.59<br>423.40<br>560.18<br>928.20<br>1076.23<br>1409.09<br>1520.69<br>3150.01<br>3288.04 | 214.48<br>442.04<br>817.72<br>1040.18<br>1221.78<br>1475.72<br>2149.92<br>3150.81<br>353.26i |
| CCSD(T)-F12a/cc-pVDZ-F12 | 49.87         | 106.57<br>293.04<br>471.44<br>918.95<br>1063.39<br>1352.34<br>1482.55                       | 141.54<br>419.01<br>556.64<br>925.29<br>1070.13<br>1408.04<br>1517.64                       | 217.82<br>437.64<br>807.26<br>1037.00<br>1218.17<br>1475.00<br>2147.12                       |

|                             |       |         |         |         |
|-----------------------------|-------|---------|---------|---------|
|                             |       | 3064.46 | 3149.96 | 3151.63 |
|                             |       | 3161.02 | 3289.45 | 353.51i |
| DF-CCSD(T)-F12b/jun-cc-pVDZ | 50.07 | 141.06  | 150.37  | 212.02  |
|                             |       | 294.31  | 413.35  | 440.73  |
|                             |       | 475.12  | 561.03  | 807.59  |
|                             |       | 899.76  | 937.09  | 1027.40 |
|                             |       | 1056.13 | 1065.22 | 1206.62 |
|                             |       | 1354.66 | 1396.42 | 1464.05 |
|                             |       | 1470.55 | 1512.24 | 2157.07 |
|                             |       | 3090.56 | 3174.58 | 3192.29 |
|                             |       | 3199.90 | 3321.81 | 357.96i |
| M06CR/MG3S                  | 49.23 | 143.25  | 163.86  | 203.83  |
|                             |       | 279.42  | 442.46  | 459.66  |
|                             |       | 483.03  | 571.23  | 842.68  |
|                             |       | 953.00  | 990.32  | 1027.13 |
|                             |       | 1039.15 | 1086.29 | 1223.39 |
|                             |       | 1376.66 | 1383.94 | 1440.48 |
|                             |       | 1448.41 | 1540.54 | 2243.74 |
|                             |       | 3071.52 | 3133.64 | 3159.03 |
|                             |       | 3167.23 | 3269.04 | 328.47i |
| M11-L/MG3S                  | 48.48 | 142.15  | 159.87  | 204.15  |
|                             |       | 280.16  | 431.26  | 451.25  |
|                             |       | 472.93  | 562.07  | 824.07  |
|                             |       | 945.11  | 972.05  | 1010.03 |
|                             |       | 1031.96 | 1044.08 | 1205.32 |
|                             |       | 1355.02 | 1363.45 | 1414.53 |
|                             |       | 1425.02 | 1526.27 | 2224.38 |
|                             |       | 2987.55 | 3012.87 | 3102.21 |
|                             |       | 3116.59 | 3164.82 | 398.76i |
| MN15-L/MG3S                 | 48.83 | 142.26  | 178.62  | 203.91  |
|                             |       | 281.31  | 432.45  | 450.52  |
|                             |       | 475.20  | 562.78  | 835.81  |
|                             |       | 940.02  | 955.83  | 1036.77 |
|                             |       | 1052.52 | 1084.43 | 1224.27 |
|                             |       | 1384.35 | 1392.24 | 1457.15 |
|                             |       | 1466.11 | 1535.37 | 2196.44 |
|                             |       | 3037.46 | 3113.11 | 3129.98 |
|                             |       | 3144.00 | 3250.32 | 339.83i |

(d) M1.

| Methods                  | ZPE(kcal/mol) | Frequencies (cm <sup>-1</sup> ) |        |        |
|--------------------------|---------------|---------------------------------|--------|--------|
| CCSD(T)-F12a/cc-pVTZ-F12 | 52.81         | 114.21                          | 152.97 | 243.18 |
|                          |               | 342.27                          | 593.81 | 653.42 |

|                             |       |         |         |         |
|-----------------------------|-------|---------|---------|---------|
|                             |       | 769.18  | 853.05  | 957.98  |
|                             |       | 959.05  | 995.45  | 1066.08 |
|                             |       | 1100.79 | 1122.61 | 1205.50 |
|                             |       | 1272.33 | 1371.17 | 1421.02 |
|                             |       | 1484.15 | 1486.68 | 1529.73 |
|                             |       | 1744.41 | 3020.57 | 3061.56 |
|                             |       | 3111.37 | 3135.24 | 3175.22 |
| CCSD(T)-F12a/cc-pVDZ-F12    | 52.85 | 119.70  | 154.95  | 243.31  |
|                             |       | 342.56  | 593.12  | 652.36  |
|                             |       | 767.78  | 852.66  | 956.81  |
|                             |       | 957.96  | 994.40  | 1067.42 |
|                             |       | 1100.35 | 1122.18 | 1207.50 |
|                             |       | 1271.52 | 1373.78 | 1422.89 |
|                             |       | 1487.50 | 1489.88 | 1532.22 |
|                             |       | 1741.54 | 3021.72 | 3064.82 |
|                             |       | 3112.14 | 3137.04 | 3177.18 |
| DF-CCSD(T)-F12b/jun-cc-pVDZ | 52.98 | 116.21  | 184.64  | 242.19  |
|                             |       | 340.89  | 585.47  | 654.06  |
|                             |       | 769.60  | 830.64  | 952.99  |
|                             |       | 966.43  | 1000.35 | 1055.58 |
|                             |       | 1094.43 | 1122.12 | 1200.14 |
|                             |       | 1272.39 | 1362.44 | 1415.35 |
|                             |       | 1471.09 | 1475.91 | 1514.89 |
|                             |       | 1760.63 | 3045.02 | 3088.76 |
|                             |       | 3148.60 | 3175.86 | 3212.58 |
| M06CR/MG3S                  | 51.79 | 112.57  | 121.99  | 250.97  |
|                             |       | 354.43  | 615.30  | 671.66  |
|                             |       | 789.24  | 907.89  | 949.84  |
|                             |       | 996.10  | 1008.12 | 1046.21 |
|                             |       | 1095.42 | 1133.18 | 1192.97 |
|                             |       | 1268.67 | 1353.02 | 1399.43 |
|                             |       | 1454.22 | 1456.97 | 1509.67 |
|                             |       | 1786.70 | 2996.62 | 3074.59 |
|                             |       | 3076.82 | 3146.13 | 3194.80 |
| M11-L/MG3S                  | 51.61 | 122.67  | 167.42  | 252.10  |
|                             |       | 347.12  | 610.97  | 682.16  |
|                             |       | 810.31  | 923.46  | 968.28  |
|                             |       | 995.06  | 1025.70 | 1037.07 |
|                             |       | 1098.48 | 1144.79 | 1191.34 |
|                             |       | 1287.33 | 1351.37 | 1403.69 |
|                             |       | 1433.88 | 1441.44 | 1490.05 |
|                             |       | 1780.91 | 2859.95 | 2972.46 |
|                             |       | 3000.54 | 3099.90 | 3149.78 |
| MN15-L/MG3S                 | 51.50 | 123.51  | 154.65  | 247.93  |

|  |  |         |         |         |
|--|--|---------|---------|---------|
|  |  | 338.72  | 603.51  | 667.36  |
|  |  | 786.06  | 904.43  | 969.83  |
|  |  | 982.17  | 1008.57 | 1051.15 |
|  |  | 1101.95 | 1129.09 | 1202.79 |
|  |  | 1281.17 | 1367.62 | 1409.84 |
|  |  | 1472.60 | 1475.85 | 1517.39 |
|  |  | 1758.37 | 2936.72 | 3044.83 |
|  |  | 3045.93 | 3121.21 | 3172.88 |

Table S13. Frequencies and zero-point vibrational energies for R2 path.

(a) *anti*-CH<sub>3</sub>CHOO

| Methods                     | ZPE(kcal/mol) | Frequencies (cm <sup>-1</sup> ) |         |         |
|-----------------------------|---------------|---------------------------------|---------|---------|
| DF-CCSD(T)-F12b/jun-cc-pVDZ | 37.02         | 144.09                          | 248.02  | 321.11  |
|                             |               | 557.37                          | 829.85  | 879.37  |
|                             |               | 937.06                          | 1040.73 | 1159.55 |
|                             |               | 1310.85                         | 1408.94 | 1456.65 |
|                             |               | 1463.30                         | 1527.31 | 3069.25 |
|                             |               | 3147.61                         | 3192.44 | 3201.14 |
| M11-L/MG3S                  | 36.10         | 167.52                          | 264.90  | 326.80  |
|                             |               | 575.62                          | 851.54  | 905.05  |
|                             |               | 1026.14                         | 1041.38 | 1145.35 |
|                             |               | 1315.96                         | 1391.47 | 1416.83 |
|                             |               | 1423.64                         | 1599.37 | 2967.37 |
|                             |               | 3047.28                         | 3052.40 | 3121.55 |
| MN15-L/MG3S                 | 36.23         | 171.94                          | 264.15  | 326.19  |
|                             |               | 565.33                          | 863.02  | 906.31  |
|                             |               | 1011.66                         | 1051.82 | 1160.22 |
|                             |               | 1340.05                         | 1408.64 | 1456.70 |
|                             |               | 1458.50                         | 1590.24 | 3011.83 |
|                             |               | 3072.60                         | 3126.51 | 3150.73 |
| M06CR/MG3S                  | 36.55         | 167.52                          | 264.90  | 326.80  |
|                             |               | 575.62                          | 851.54  | 905.05  |
|                             |               | 1026.14                         | 1041.38 | 1145.35 |
|                             |               | 1315.96                         | 1391.47 | 1416.83 |
|                             |               | 1423.64                         | 1599.37 | 2967.37 |

|  |  |         |         |         |
|--|--|---------|---------|---------|
|  |  | 3047.28 | 3052.40 | 3121.55 |
|--|--|---------|---------|---------|

(b) TS2

| Methods                     | ZPE(kcal/mol) | Frequencies (cm <sup>-1</sup> ) |         |         |
|-----------------------------|---------------|---------------------------------|---------|---------|
| DF-CCSD(T)-F12b/jun-cc-pVDZ | 67.72         | 109.08                          | 140.52  | 153.19  |
|                             |               | 182.66                          | 248.86  | 314.19  |
|                             |               | 355.98                          | 430.31  | 458.84  |
|                             |               | 479.21                          | 586.85  | 885.96  |
|                             |               | 938.41                          | 957.40  | 983.54  |
|                             |               | 1040.33                         | 1055.62 | 1080.64 |
|                             |               | 1169.70                         | 1315.82 | 1395.81 |
|                             |               | 1403.43                         | 1449.21 | 1464.43 |
|                             |               | 1470.44                         | 1471.27 | 1532.34 |
|                             |               | 2143.96                         | 3077.38 | 3089.01 |
|                             |               | 3170.23                         | 3190.40 | 3196.90 |
|                             |               | 3202.36                         | 3223.29 |         |
| M11-L/MG3S                  | 65.58         | -430.98                         | 111.65  | 140.99  |
|                             |               | 171.04                          | 182.77  | 254.42  |
|                             |               | 315.44                          | 335.98  | 446.63  |
|                             |               | 468.58                          | 481.91  | 601.35  |
|                             |               | 894.75                          | 941.15  | 954.00  |
|                             |               | 1008.33                         | 1032.56 | 1043.71 |
|                             |               | 1065.66                         | 1150.94 | 1302.54 |
|                             |               | 1363.39                         | 1378.07 | 1412.57 |
|                             |               | 1419.75                         | 1428.53 | 1431.38 |
|                             |               | 1548.94                         | 2193.35 | 2987.38 |
|                             |               | 2988.30                         | 3060.47 | 3096.03 |
|                             |               | 3103.67                         | 3114.40 | 3134.78 |
| MN15-L/MG3S                 | 65.85         | -357.16                         | 111.98  | 143.34  |
|                             |               | 175.68                          | 186.73  | 262.78  |
|                             |               | 314.29                          | 338.33  | 449.51  |
|                             |               | 469.49                          | 484.22  | 593.93  |
|                             |               | 896.65                          | 944.56  | 960.47  |
|                             |               | 1029.80                         | 1041.20 | 1052.58 |
|                             |               | 1087.70                         | 1164.97 | 1327.63 |
|                             |               | 1391.70                         | 1397.94 | 1443.81 |
|                             |               | 1459.53                         | 1467.99 | 1471.57 |
|                             |               | 1540.46                         | 2168.61 | 3029.38 |
|                             |               | 3037.08                         | 3117.80 | 3129.43 |
|                             |               | 3140.08                         | 3150.23 | 3164.72 |
| M06CR/MG3S                  | 66.38         | -336.21                         | 112.06  | 145.28  |
|                             |               | 163.53                          | 183.18  | 261.38  |
|                             |               | 325.28                          | 352.27  | 457.85  |



|  |  |         |         |         |
|--|--|---------|---------|---------|
|  |  | 477.59  | 493.93  | 603.12  |
|  |  | 906.59  | 951.75  | 963.23  |
|  |  | 1026.98 | 1039.70 | 1067.96 |
|  |  | 1087.32 | 1165.67 | 1323.51 |
|  |  | 1376.35 | 1388.33 | 1432.54 |
|  |  | 1442.81 | 1450.33 | 1453.28 |
|  |  | 1554.18 | 2219.09 | 3059.84 |
|  |  | 3071.51 | 3142.09 | 3158.97 |
|  |  | 3164.82 | 3172.55 | 3185.86 |

## (c) M2

| Methods     | ZPE(kcal/mol) | Frequencies (cm <sup>-1</sup> ) |         |         |
|-------------|---------------|---------------------------------|---------|---------|
| M11-L/MG3S  | 68.46         | 61.96                           | 112.03  | 202.06  |
|             |               | 233.52                          | 319.33  | 386.93  |
|             |               | 456.68                          | 628.74  | 679.62  |
|             |               | 771.59                          | 861.26  | 909.12  |
|             |               | 960.49                          | 997.86  | 1032.42 |
|             |               | 1034.76                         | 1052.53 | 1120.53 |
|             |               | 1168.43                         | 1277.47 | 1322.57 |
|             |               | 1347.12                         | 1378.00 | 1398.15 |
|             |               | 1434.45                         | 1439.90 | 1445.77 |
|             |               | 1449.35                         | 1780.01 | 2910.65 |
|             |               | 2980.16                         | 3001.40 | 3100.85 |
| 3102.08     | 3111.12       | 3150.32                         |         |         |
| MN15-L/MG3S | 68.48         | 100.09                          | 127.93  | 200.16  |
|             |               | 244.69                          | 323.89  | 383.87  |
|             |               | 463.11                          | 622.91  | 665.26  |
|             |               | 766.68                          | 862.38  | 902.71  |
|             |               | 943.61                          | 984.21  | 1018.93 |
|             |               | 1045.24                         | 1061.07 | 1128.47 |
|             |               | 1152.15                         | 1267.78 | 1321.04 |
|             |               | 1360.08                         | 1389.87 | 1404.79 |
|             |               | 1472.63                         | 1475.76 | 1479.65 |
|             |               | 1483.02                         | 1751.56 | 3020.69 |
|             |               | 3022.88                         | 3044.04 | 3117.69 |
| 3120.22     | 3129.44       | 3171.96                         |         |         |
| M06CR/MG3S  | 68.86         | 49.78                           | 118.27  | 201.61  |
|             |               | 238.46                          | 323.40  | 398.27  |
|             |               | 463.75                          | 632.69  | 671.59  |
|             |               | 764.87                          | 838.62  | 910.68  |
|             |               | 951.16                          | 997.93  | 1024.79 |
|             |               | 1044.45                         | 1054.11 | 1126.91 |

|  |  |         |         |         |
|--|--|---------|---------|---------|
|  |  | 1165.48 | 1266.52 | 1317.86 |
|  |  | 1361.34 | 1383.81 | 1395.73 |
|  |  | 1454.57 | 1457.40 | 1464.67 |
|  |  | 1466.81 | 1784.64 | 3039.55 |
|  |  | 3059.97 | 3074.44 | 3145.93 |
|  |  | 3151.10 | 3154.74 | 3194.38 |

Table S14. Frequencies and zero-point vibrational energies for R3 path.

(a) *syn*-CH<sub>3</sub>CHOO

| Methods                     | ZPE(kcal/mol) | Frequencies (cm <sup>-1</sup> ) |         |         |
|-----------------------------|---------------|---------------------------------|---------|---------|
| DF-CCSD(T)-F12b/jun-cc-pVDZ | 37.27         | 208.36                          | 305.54  | 434.75  |
|                             |               | 672.61                          | 711.11  | 883.94  |
|                             |               | 980.16                          | 1019.76 | 1114.55 |
|                             |               | 1304.51                         | 1385.54 | 1437.70 |
|                             |               | 1458.49                         | 1523.40 | 3059.37 |
|                             |               | 3128.18                         | 3203.79 | 3236.14 |
| M11-L/MG3S                  | 36.36         | 227.91                          | 309.26  | 471.05  |
|                             |               | 691.95                          | 734.05  | 979.10  |
|                             |               | 992.62                          | 998.59  | 1098.15 |
|                             |               | 1310.97                         | 1367.77 | 1384.06 |
|                             |               | 1421.21                         | 1591.93 | 2963.63 |
|                             |               | 3038.49                         | 3097.86 | 3139.64 |
| MN15-L/MG3S                 | 36.47         | 242.78                          | 314.92  | 463.44  |
|                             |               | 677.56                          | 744.30  | 950.85  |
|                             |               | 991.20                          | 1025.09 | 1109.78 |
|                             |               | 1337.97                         | 1390.24 | 1429.49 |
|                             |               | 1457.45                         | 1573.83 | 3007.19 |
|                             |               | 3059.58                         | 3158.73 | 3175.24 |
| M06CR/MG3S                  | 36.75         | 210.92                          | 309.73  | 482.13  |
|                             |               | 691.91                          | 762.20  | 976.69  |
|                             |               | 1002.86                         | 1024.73 | 1106.41 |
|                             |               | 1336.55                         | 1385.47 | 1413.36 |
|                             |               | 1442.45                         | 1591.03 | 3034.41 |

|  |  |         |         |         |
|--|--|---------|---------|---------|
|  |  | 3082.42 | 3182.83 | 3197.59 |
|--|--|---------|---------|---------|

## (b) TS3

| Methods                     | ZPE(kcal/mol) | Frequencies (cm <sup>-1</sup> ) |         |         |
|-----------------------------|---------------|---------------------------------|---------|---------|
| DF-CCSD(T)-F12b/jun-cc-pVDZ | 67.74         | 111.40                          | 143.39  | 181.17  |
|                             |               | 216.02                          | 272.13  | 272.58  |
|                             |               | 352.43                          | 426.81  | 489.33  |
|                             |               | 501.47                          | 658.71  | 859.37  |
|                             |               | 913.46                          | 931.26  | 954.45  |
|                             |               | 1039.24                         | 1055.41 | 1068.47 |
|                             |               | 1160.77                         | 1318.94 | 1384.49 |
|                             |               | 1396.02                         | 1449.24 | 1464.70 |
|                             |               | 1470.62                         | 1476.51 | 1528.08 |
|                             |               | 2139.07                         | 3065.57 | 3088.84 |
|                             |               | 3169.58                         | 3189.83 | 3196.53 |
|                             |               | 3202.17                         | 3233.62 |         |
| M11-L/MG3S                  | 65.62         | -440.84                         | 114.07  | 162.51  |
|                             |               | 184.66                          | 207.85  | 264.24  |
|                             |               | 281.29                          | 351.12  | 447.51  |
|                             |               | 495.99                          | 505.10  | 659.95  |
|                             |               | 869.94                          | 923.16  | 958.41  |
|                             |               | 975.62                          | 1018.04 | 1034.75 |
|                             |               | 1049.14                         | 1142.03 | 1316.48 |
|                             |               | 1350.00                         | 1364.85 | 1409.16 |
|                             |               | 1418.88                         | 1427.92 | 1433.93 |
|                             |               | 1543.19                         | 2194.84 | 2980.71 |
|                             |               | 2987.49                         | 3043.35 | 3100.77 |
|                             |               | 3102.53                         | 3114.40 | 3164.83 |
| MN15-L/MG3S                 | 65.88         | -387.52                         | 112.72  | 169.08  |
|                             |               | 196.83                          | 207.20  | 269.31  |
|                             |               | 287.00                          | 357.62  | 448.29  |
|                             |               | 496.61                          | 503.63  | 655.97  |
|                             |               | 873.36                          | 929.24  | 954.18  |
|                             |               | 965.34                          | 1037.55 | 1052.80 |
|                             |               | 1066.66                         | 1157.50 | 1333.82 |
|                             |               | 1379.18                         | 1392.23 | 1446.56 |
|                             |               | 1459.55                         | 1467.59 | 1474.60 |
|                             |               | 1534.49                         | 2169.49 | 3015.99 |
|                             |               | 3036.47                         | 3123.92 | 3128.45 |
|                             |               | 3138.00                         | 3140.28 | 3190.33 |
| M06CR/MG3S                  | 66.41         | -371.06                         | 114.25  | 156.08  |
|                             |               | 189.68                          | 212.00  | 268.52  |
|                             |               | 281.78                          | 352.22  | 457.75  |

|  |  |         |         |         |
|--|--|---------|---------|---------|
|  |  | 505.52  | 521.32  | 671.35  |
|  |  | 883.31  | 938.74  | 963.50  |
|  |  | 991.30  | 1031.23 | 1039.67 |
|  |  | 1067.37 | 1151.93 | 1344.09 |
|  |  | 1370.49 | 1376.81 | 1431.45 |
|  |  | 1442.96 | 1450.11 | 1458.45 |
|  |  | 1542.28 | 2217.33 | 3048.46 |
|  |  | 3071.14 | 3149.28 | 3158.20 |
|  |  | 3164.70 | 3165.12 | 3212.23 |

## (c) M3

| Methods     | ZPE(kcal/mol) | Frequencies (cm <sup>-1</sup> ) |         |         |
|-------------|---------------|---------------------------------|---------|---------|
| M11-L/MG3S  | 68.57         | 102.71                          | 127.43  | 208.31  |
|             |               | 228.70                          | 292.24  | 389.75  |
|             |               | 469.75                          | 622.84  | 679.67  |
|             |               | 756.21                          | 865.33  | 908.66  |
|             |               | 956.92                          | 1005.83 | 1031.47 |
|             |               | 1039.04                         | 1097.23 | 1121.63 |
|             |               | 1183.03                         | 1269.70 | 1330.52 |
|             |               | 1355.52                         | 1392.32 | 1406.91 |
|             |               | 1433.80                         | 1440.85 | 1447.75 |
|             |               | 1451.95                         | 1782.30 | 2828.81 |
|             |               | 2989.02                         | 3000.69 | 3099.86 |
|             |               | 3111.00                         | 3117.18 | 3150.09 |
| MN15-L/MG3S | 68.40         | 95.50                           | 126.36  | 206.84  |
|             |               | 225.81                          | 290.13  | 380.43  |
|             |               | 460.18                          | 613.89  | 666.20  |
|             |               | 740.31                          | 859.40  | 902.67  |
|             |               | 938.66                          | 988.97  | 1025.04 |
|             |               | 1053.01                         | 1093.20 | 1127.38 |
|             |               | 1172.71                         | 1270.34 | 1338.56 |
|             |               | 1374.81                         | 1400.64 | 1406.54 |
|             |               | 1472.79                         | 1475.93 | 1481.21 |
|             |               | 1485.68                         | 1756.80 | 2914.04 |
|             |               | 3031.36                         | 3044.18 | 3120.41 |
|             |               | 3129.62                         | 3134.00 | 3172.10 |
| M06CR/MG3S  | 68.89         | 82.97                           | 121.32  | 208.92  |
|             |               | 234.27                          | 300.40  | 399.51  |
|             |               | 469.70                          | 625.27  | 673.74  |
|             |               | 746.60                          | 846.49  | 908.75  |
|             |               | 943.90                          | 1006.31 | 1026.70 |
|             |               | 1046.83                         | 1075.23 | 1126.50 |
|             |               | 1178.64                         | 1262.59 | 1324.91 |

|  |  |         |         |         |
|--|--|---------|---------|---------|
|  |  | 1368.13 | 1393.06 | 1401.90 |
|  |  | 1454.46 | 1456.94 | 1465.91 |
|  |  | 1468.83 | 1786.21 | 2977.20 |
|  |  | 3064.98 | 3074.01 | 3145.38 |
|  |  | 3155.59 | 3159.03 | 3194.14 |

Table S15. Cartesian coordinates (Å) and absolute energies (hartrees) of optimized structures for R1 path.

(a) by M06CR/MG3S

| Species            | Absolute energy (hartrees) | Cartesian coordinates |             |             |             |
|--------------------|----------------------------|-----------------------|-------------|-------------|-------------|
| CH <sub>2</sub> OO | -189.47                    | C                     | 1.06051700  | -0.21853800 | 0.00000000  |
|                    |                            | O                     | 0.00000000  | 0.44258900  | 0.00000000  |
|                    |                            | O                     | -1.16683800 | -0.16194300 | 0.00000000  |
|                    |                            | H                     | 1.00256900  | -1.30226200 | 0.00000000  |
|                    |                            | H                     | 1.96903400  | 0.36832400  | 0.00000000  |
| CH <sub>3</sub> CN | -132.66                    | C                     | 0.00000000  | 0.00000000  | 0.27875800  |
|                    |                            | N                     | 0.00000000  | 0.00000000  | 1.42650700  |
|                    |                            | C                     | 0.00000000  | 0.00000000  | -1.17009100 |
|                    |                            | H                     | 0.00000000  | 1.02150500  | -1.54585100 |
|                    |                            | H                     | 0.88464900  | -0.51075300 | -1.54585100 |
|                    |                            | H                     | -0.88464900 | -0.51075300 | -1.54585100 |
| TS1                | -322.13                    | C                     | -1.63939300 | 0.52554000  | 0.21999400  |
|                    |                            | O                     | -1.40046300 | -0.56492400 | -0.37720200 |
|                    |                            | O                     | -0.38935300 | -1.26604100 | 0.18609900  |
|                    |                            | H                     | -1.43477600 | 0.60353000  | 1.28005500  |
|                    |                            | H                     | -2.35243200 | 1.17034700  | -0.27984600 |
|                    |                            | C                     | 0.97308500  | 0.51383300  | -0.03190500 |
|                    |                            | N                     | 0.22136600  | 1.40326800  | -0.08846800 |
|                    |                            | C                     | 2.18406800  | -0.28364600 | -0.00097100 |
|                    |                            | H                     | 2.18975700  | -0.89497700 | 0.89884900  |
|                    |                            | H                     | 2.20065900  | -0.95298000 | -0.85773100 |
|                    |                            | H                     | 3.05920400  | 0.36455700  | -0.01594200 |

|    |         |   |             |             |             |
|----|---------|---|-------------|-------------|-------------|
| M1 | -322.22 | C | 1.44664800  | 0.63619900  | 0.05541100  |
|    |         | O | 1.35379100  | -0.79797700 | -0.09185300 |
|    |         | O | -0.03210000 | -1.08200600 | 0.06810400  |
|    |         | H | 2.09400700  | 1.00071700  | -0.74528100 |
|    |         | H | 1.88262700  | 0.88776800  | 1.03076000  |
|    |         | C | -0.63960400 | 0.12865000  | -0.00442600 |
|    |         | N | 0.11023500  | 1.14143400  | -0.04629500 |
|    |         | C | -2.11734600 | 0.07065500  | -0.00864700 |
|    |         | H | -2.46991800 | -0.48263200 | -0.87801500 |
|    |         | H | -2.47423100 | -0.44812300 | 0.88031100  |
|    |         | H | -2.51584500 | 1.07907100  | -0.02773300 |

(b) by CCSD(T)-F12a/cc-pVTZ-F12

| Species            | Absolute energy (hartrees) | Cartesian coordinates |               |               |               |
|--------------------|----------------------------|-----------------------|---------------|---------------|---------------|
| CH <sub>2</sub> OO | -189.41                    | C                     | -1.0649415951 | 0.1992476468  | 0.0000000000  |
|                    |                            | O                     | 0.0146891002  | -0.4698160766 | 0.0000000000  |
|                    |                            | O                     | 1.1726406690  | 0.2082457675  | 0.0000000000  |
|                    |                            | H                     | -1.0049041189 | 1.2797686039  | 0.0000000000  |
|                    |                            | H                     | -1.9662640554 | -0.3944549416 | 0.0000000000  |
| CH <sub>3</sub> CN | -132.59                    | C                     | 0.0000000000  | -0.0000035710 | 0.2849766443  |
|                    |                            | N                     | 0.0000000000  | -0.0000027010 | 1.4428019700  |
|                    |                            | C                     | 0.0000000000  | -0.0000084755 | 1.1777587326  |
|                    |                            | H                     | 0.0000000000  | 1.0238364403  | -1.5464111275 |
|                    |                            | H                     | 0.8866476636  | -0.5119113464 | -1.5463938771 |
|                    |                            | H                     | -0.8866476636 | -0.5119113464 | -1.5463938771 |
| TS1                | -322.00                    | C                     | -1.6519584877 | 0.5147929532  | 0.2340577647  |
|                    |                            | O                     | -1.4037705250 | -0.5726791139 | -0.3852341859 |
|                    |                            | O                     | -0.3457058464 | -1.2456238653 | 0.1979338565  |
|                    |                            | H                     | -1.4255955131 | 0.5828673451  | 1.2877543704  |
|                    |                            | H                     | -2.3759662780 | 1.1543923373  | -0.2529756149 |
|                    |                            | C                     | 0.9419608128  | 0.4954380716  | -0.0260415001 |
|                    |                            | N                     | 0.2077883989  | 1.4135554912  | -0.0817420642 |
|                    |                            | C                     | 2.1772578492  | -0.2927310651 | -0.0057011603 |
|                    |                            | H                     | 2.1935957037  | -0.9046462957 | 0.8938607964  |
|                    |                            | H                     | 2.1956000642  | -0.9527924794 | -0.8696604150 |
|                    |                            | H                     | 3.0383648214  | 0.3741066212  | -0.0216168476 |
| M1                 | -322.08                    | C                     | -1.4599072789 | -0.6257522563 | 0.0771521984  |
|                    |                            | O                     | -1.3754767824 | 0.8019885219  | -0.1194243465 |
|                    |                            | O                     | 0.0373899037  | 1.0954460672  | 0.1116280936  |
|                    |                            | H                     | -2.1343764429 | -1.0044217266 | -0.6899019095 |

|  |  |   |               |               |               |
|--|--|---|---------------|---------------|---------------|
|  |  | H | -1.8422980717 | -0.8517224915 | 1.0781566591  |
|  |  | C | 0.6352261634  | -0.1244862598 | -0.0017451588 |
|  |  | N | -0.1169552163 | -1.1438962142 | -0.0665963409 |
|  |  | C | 2.1213421397  | -0.0735754792 | -0.0117432328 |
|  |  | H | 2.4694351431  | 0.4770907271  | -0.8849893946 |
|  |  | H | 2.4806472206  | 0.4398402098  | 0.8798731685  |
|  |  | H | 2.5074522217  | -1.0882290985 | -0.0338297368 |

(c) by CCSD(T)-F12a/cc-pVDZ-F12

| Species            | Absolute energy (hartrees) | Cartesian coordinates |               |               |               |
|--------------------|----------------------------|-----------------------|---------------|---------------|---------------|
| CH <sub>2</sub> OO | -189.38                    | C                     | -1.0653788937 | 0.1993413752  | 0.0000000000  |
|                    |                            | O                     | 0.0157326658  | -0.4711795226 | 0.0000000000  |
|                    |                            | O                     | 1.1734170344  | 0.2088162868  | 0.0000000000  |
|                    |                            | H                     | -1.0054411078 | 1.2798271995  | 0.0000000000  |
|                    |                            | H                     | -1.9671096988 | -0.3938143388 | 0.0000000000  |
| CH <sub>3</sub> CN | -132.57                    | C                     | 0.0000000000  | -0.0000035596 | 0.2854845029  |
|                    |                            | N                     | 0.0000000000  | -0.0000027441 | 1.4438564815  |
|                    |                            | C                     | 0.0000000000  | -0.0000085799 | -1.1782580792 |
|                    |                            | H                     | 0.0000000000  | 1.0238226777  | -1.5467655604 |
|                    |                            | H                     | 0.8866355509  | -0.5119043971 | -1.5467481724 |
|                    |                            | H                     | -0.8866355509 | -0.5119043971 | -1.5467481724 |
| TS1                | -321.96                    | C                     | -1.6542534416 | 0.5154804872  | 0.2343623134  |
|                    |                            | O                     | -1.4052915276 | -0.5727575035 | -0.3864893396 |
|                    |                            | O                     | -0.3470091992 | -1.2460229808 | 0.1968330691  |
|                    |                            | H                     | -1.4277271256 | 0.5832284950  | 1.2879983539  |
|                    |                            | H                     | -2.3783251212 | 1.1550661108  | -0.2524457329 |
|                    |                            | C                     | 0.9420353003  | 0.4942689322  | -0.0253758759 |
|                    |                            | N                     | 0.2098211338  | 1.4146535311  | -0.0811120120 |
|                    |                            | C                     | 2.1786933372  | -0.2936259346 | -0.0055901580 |
|                    |                            | H                     | 2.1976308504  | -0.9041936942 | 0.8947248329  |
|                    |                            | H                     | 2.1976393358  | -0.9543286762 | -0.8689386793 |
|                    |                            | H                     | 3.0383574578  | 0.3749112331  | -0.0233317717 |
| M1                 | -322.04                    | C                     | -1.4607449949 | -0.6257655648 | 0.0768587660  |
|                    |                            | O                     | -1.3768538458 | 0.8026566875  | -0.1200343841 |
|                    |                            | O                     | 0.0373679980  | 1.0963847653  | 0.1139073555  |
|                    |                            | H                     | -2.1359175599 | -1.0045006455 | -0.6896375751 |
|                    |                            | H                     | -1.8424374766 | -0.8523524359 | 1.0780573678  |
|                    |                            | C                     | 0.6352009130  | -0.1244647956 | -0.0016193969 |

|  |  |   |               |               |               |
|--|--|---|---------------|---------------|---------------|
|  |  | N | -0.1168537034 | -1.1448191459 | -0.0681444176 |
|  |  | C | 2.1223420082  | -0.0735494195 | -0.0117322512 |
|  |  | H | 2.4703416667  | 0.4758553694  | -0.8857763657 |
|  |  | H | 2.4815823485  | 0.4410527896  | 0.8791854073  |
|  |  | H | 2.5084516463  | -1.0882156046 | -0.0324845063 |

(d) by DF-CCSD(T)-F12b/jun-cc-pVDZ

| Species            | Absolute energy (hartrees) | Cartesian coordinates |               |               |               |
|--------------------|----------------------------|-----------------------|---------------|---------------|---------------|
| CH <sub>2</sub> OO | -189.28                    | C                     | -1.0660225872 | 0.1999444614  | 0.0000000000  |
|                    |                            | O                     | 0.0192321342  | -0.4711285542 | 0.0000000000  |
|                    |                            | O                     | 1.1781680485  | 0.2053782480  | 0.0000000000  |
|                    |                            | H                     | -1.0066205545 | 1.2906313984  | 0.0000000000  |
|                    |                            | H                     | -1.9735370410 | -0.4018345535 | 0.0000000000  |
| CH <sub>3</sub> CN | -132.50                    | C                     | -0.0000000054 | -0.0000000934 | 0.2881692508  |
|                    |                            | N                     | 0.0000000060  | 0.0000000470  | 1.4574605957  |
|                    |                            | C                     | -0.0000000015 | -0.0000002169 | -1.1808352630 |
|                    |                            | H                     | 0.0000000004  | 1.0328441612  | -1.5513246088 |
|                    |                            | H                     | 0.8944694949  | -0.5164224490 | -1.5513244834 |
|                    |                            | H                     | -0.8944694943 | -0.5164224490 | -1.5513244913 |
| TS1                | -321.79                    | C                     | -1.6624770330 | 0.5181043251  | 0.2349678509  |
|                    |                            | O                     | -1.4116763635 | -0.5730237547 | -0.3879359460 |
|                    |                            | O                     | -0.3547733605 | -1.2477677204 | 0.1953193050  |
|                    |                            | H                     | -1.4368176463 | 0.5830643958  | 1.2993100953  |
|                    |                            | H                     | -2.3966104810 | 1.1595060081  | -0.2567998020 |
|                    |                            | C                     | 0.9463864911  | 0.4924314699  | -0.0276182717 |
|                    |                            | N                     | 0.2086854567  | 1.4226131938  | -0.0823016521 |
|                    |                            | C                     | 2.1894199938  | -0.2960880788 | -0.0064612805 |
|                    |                            | H                     | 2.2066487789  | -0.9096761624 | 0.9030593478  |
|                    |                            | H                     | 2.2087143557  | -0.9634651718 | -0.8764844379 |
|                    |                            | H                     | 3.0540708082  | 0.3809814955  | -0.0244202088 |
| M1                 | -321.87                    | C                     | -1.4633752820 | -0.6243637353 | 0.0732302080  |
|                    |                            | O                     | -1.3773292419 | 0.7984995342  | -0.1461206027 |
|                    |                            | O                     | 0.0320294506  | 1.0941233591  | 0.1375290970  |
|                    |                            | H                     | -2.1614077995 | -1.0088016430 | -0.6827998623 |
|                    |                            | H                     | -1.8296307946 | -0.8413647688 | 1.0930965943  |
|                    |                            | C                     | 0.6366054184  | -0.1265182126 | -0.0047908451 |
|                    |                            | N                     | -0.1205190258 | -1.1510163366 | -0.0908567843 |
|                    |                            | C                     | 2.1267797089  | -0.0725280863 | -0.0101319638 |



|  |  |   |              |               |               |
|--|--|---|--------------|---------------|---------------|
|  |  | H | 2.4780338947 | 0.4830418126  | -0.8905761296 |
|  |  | H | 2.4832258357 | 0.4466718123  | 0.8904942384  |
|  |  | H | 2.5180668357 | -1.0954617355 | -0.0304939501 |

Table S16. Cartesian coordinates (Å) and absolute energies (hartrees) of optimized structures for R2 path(*anti*-CH<sub>3</sub>CHOO + CH<sub>3</sub>CN).

(a) by DF-CCSD(T)-F12b/jun-cc-pVDZ

| Species                           | Absolute energy (hartrees) | Cartesian coordinates |               |               |               |
|-----------------------------------|----------------------------|-----------------------|---------------|---------------|---------------|
| <i>anti</i> -CH <sub>3</sub> CHOO | -228.52                    | C                     | 0.0029814656  | 0.5642599882  | 0.0000000193  |
|                                   |                            | O                     | 0.1462898413  | -0.6984780840 | -0.0000000701 |
|                                   |                            | O                     | 1.4178602368  | -1.1916911975 | -0.0000000331 |
|                                   |                            | H                     | 0.9253204744  | 1.1566353372  | 0.0000001053  |
|                                   |                            | C                     | -1.3751037059 | 1.1192691991  | -0.0000000030 |
|                                   |                            | H                     | -1.5232386555 | 1.7522052448  | 0.8885323728  |
|                                   |                            | H                     | -1.5232386956 | 1.7522051348  | -0.8885324524 |
|                                   |                            | H                     | -2.1121809611 | 0.3069343774  | 0.0000000612  |
| CH <sub>3</sub> CN                | -132.50                    | C                     | -0.0000000061 | -0.0000000918 | 0.2859697628  |
|                                   |                            | N                     | 0.0000000064  | 0.0000000440  | 1.4552599343  |
|                                   |                            | C                     | -0.0000000014 | -0.0000002160 | -1.1830361690 |
|                                   |                            | H                     | 0.0000000004  | 1.0328442880  | -1.5535242582 |
|                                   |                            | H                     | 0.8944696043  | -0.5164225121 | -1.5535241308 |
|                                   |                            | H                     | -0.8944696036 | -0.5164225121 | -1.5535241391 |
| TS2                               | --361.03                   | C                     | 1.2711180094  | 0.0644704854  | 0.3654569313  |
|                                   |                            | O                     | 0.7527261874  | 1.0148419534  | -0.3284676816 |
|                                   |                            | O                     | -0.4917893916 | 1.3814588989  | 0.1687145950  |
|                                   |                            | H                     | 0.9723566752  | 0.0019609944  | 1.4144430374  |
|                                   |                            | C                     | -1.2421188912 | -0.6045751702 | -0.0070109955 |
|                                   |                            | N                     | -0.2899859718 | -1.3184888371 | 0.0147261085  |
|                                   |                            | C                     | -2.6574437276 | -0.2020664097 | -0.0789246877 |
|                                   |                            | H                     | -2.8912402661 | 0.4377627936  | 0.7814874045  |
|                                   |                            | H                     | -2.8217614332 | 0.3769506169  | -0.9959289165 |
|                                   |                            | H                     | -3.2961093614 | -1.0956722908 | -0.0722424878 |
|                                   |                            | C                     | 2.5399373106  | -0.5300793345 | -0.1370002466 |
|                                   |                            | H                     | 3.3950774123  | -0.0494744511 | 0.3633811931  |
|                                   |                            | H                     | 2.5458785650  | -1.6005904990 | 0.1061297094  |
|                                   |                            | H                     | 2.6219498831  | -0.3953647502 | -1.2224109637 |

(b) by M11-L/MG3S

| Species                          | Absolute energy<br>(hartrees) | Cartesian coordinates |             |             |             |
|----------------------------------|-------------------------------|-----------------------|-------------|-------------|-------------|
| <i>anti</i> -CH <sub>3</sub> CHO | -228.92                       | C                     | 0.0000000   | 0.55187700  | 0.0000000   |
|                                  |                               | O                     | 0.15958700  | -0.67614500 | 0.0000000   |
|                                  |                               | O                     | 1.38905800  | -1.15242700 | 0.0000000   |
|                                  |                               | H                     | 0.90857200  | 1.16903200  | 0.0000000   |
|                                  |                               | C                     | -1.35782000 | 1.07589000  | 0.0000000   |
|                                  |                               | H                     | -1.53042800 | 1.71430100  | 0.87710400  |
|                                  |                               | H                     | -1.53042800 | 1.71430100  | -0.87710400 |
|                                  |                               | H                     | -2.08995300 | 0.26434100  | 0.0000000   |
| CH <sub>3</sub> CN               | -132.77                       | C                     | 0.0000000   | 0.0000000   | 0.27418500  |
|                                  |                               | N                     | 0.0000000   | 0.0000000   | 1.41703300  |
|                                  |                               | C                     | 0.0000000   | 0.0000000   | -1.15680700 |
|                                  |                               | H                     | 0.0000000   | -1.02495100 | -1.54116600 |
|                                  |                               | H                     | -0.88763300 | 0.51247500  | -1.54116600 |
|                                  |                               | H                     | 0.88763300  | 0.51247500  | -1.54116600 |
| TS2                              | -361.67                       | C                     | 1.22806500  | 0.07581900  | 0.35718200  |
|                                  |                               | O                     | 0.72329100  | 1.00118400  | -0.32873500 |
|                                  |                               | O                     | -0.48834800 | 1.35444100  | 0.15462900  |
|                                  |                               | H                     | 0.92908800  | 0.01878400  | 1.40975300  |
|                                  |                               | C                     | -1.21289000 | -0.61501500 | -0.01120000 |
|                                  |                               | N                     | -0.26269600 | -1.28735500 | 0.00280800  |
|                                  |                               | C                     | -2.58962000 | -0.21546200 | -0.07191500 |
|                                  |                               | H                     | -2.82671000 | 0.41865200  | 0.78794200  |
|                                  |                               | H                     | -2.76487100 | 0.37875600  | -0.97316800 |
|                                  |                               | H                     | -3.24760300 | -1.09205500 | -0.07298100 |
|                                  |                               | C                     | 2.48166700  | -0.50678300 | -0.12061300 |
|                                  |                               | H                     | 3.33701500  | -0.04084400 | 0.38552300  |
|                                  |                               | H                     | 2.49868500  | -1.57388800 | 0.11533900  |
|                                  |                               | H                     | 2.59038300  | -0.37427400 | -1.19993200 |
| M2                               | -361.77                       | C                     | -1.12202900 | -0.11399500 | -0.47856400 |
|                                  |                               | O                     | -0.71277100 | 1.21571300  | -0.17903300 |
|                                  |                               | O                     | 0.61573900  | 1.08734400  | 0.27936100  |
|                                  |                               | H                     | -1.61373500 | -0.05915300 | -1.47013900 |
|                                  |                               | C                     | 0.95685300  | -0.14600500 | -0.06308800 |
|                                  |                               | N                     | 0.06512100  | -0.88456800 | -0.54068100 |
|                                  |                               | C                     | 2.36234300  | -0.47538100 | 0.18966500  |
|                                  |                               | H                     | 3.02362900  | 0.17776400  | -0.38921300 |
|                                  |                               | H                     | 2.60822300  | -0.32858100 | 1.24662600  |
|                                  |                               | H                     | 2.54600000  | -1.51470300 | -0.08287600 |
|                                  |                               | C                     | -2.07808500 | -0.63198400 | 0.55521000  |

|  |  |   |             |             |            |
|--|--|---|-------------|-------------|------------|
|  |  | H | -2.96765100 | 0.00307800  | 0.61786400 |
|  |  | H | -2.39411000 | -1.64901000 | 0.30074700 |
|  |  | H | -1.59644900 | -0.65769200 | 1.53980400 |

Table S17. Cartesian coordinates (Å) and absolute energies (hartrees) of optimized structures for R3 path(*syn*-CH<sub>3</sub>CHOO + CH<sub>3</sub>CN).

(a) by DF-CCSD(T)-F12b/jun-cc-pVDZ

| Species                          | Absolute energy (hartrees) | Cartesian coordinates |               |               |               |
|----------------------------------|----------------------------|-----------------------|---------------|---------------|---------------|
| <i>syn</i> -CH <sub>3</sub> CHOO | -228.53                    | C                     | 0.4813796268  | 0.7090224817  | -0.0000058374 |
|                                  |                            | O                     | -0.7900931981 | 0.5834770668  | 0.0000008922  |
|                                  |                            | O                     | -1.2750723867 | -0.6867758358 | 0.0000092784  |
|                                  |                            | C                     | 1.3594699134  | -0.4759395463 | -0.0000042608 |
|                                  |                            | H                     | 1.1159534447  | -1.0973786637 | 0.8776557326  |
|                                  |                            | H                     | 1.1159452788  | -1.0973871276 | -0.8776559913 |
|                                  |                            | H                     | 2.4149410153  | -0.1815141263 | -0.0000106037 |
|                                  |                            | H                     | 0.8002293057  | 1.7539867513  | -0.0000122101 |
| CH <sub>3</sub> CN               | -132.50                    | C                     | -0.0000000061 | -0.0000000918 | 0.2859697628  |
|                                  |                            | N                     | 0.0000000064  | 0.0000000440  | 1.4552599343  |
|                                  |                            | C                     | -0.0000000014 | -0.0000002160 | -1.1830361690 |
|                                  |                            | H                     | 0.0000000004  | 1.0328442880  | -1.5535242582 |
|                                  |                            | H                     | 0.8944696043  | -0.5164225121 | -1.5535241308 |
|                                  |                            | H                     | -0.8944696036 | -0.5164225121 | -1.5535241391 |
| TS3                              | -361.03                    | C                     | 1.4251925616  | -0.0809268408 | -0.4590154327 |
|                                  |                            | O                     | 0.8463913880  | 1.0675585657  | -0.5873680967 |
|                                  |                            | O                     | -0.1187803858 | 1.2872148058  | 0.3811840881  |
|                                  |                            | H                     | 2.0267636942  | -0.3109319716 | -1.3453204890 |
|                                  |                            | C                     | -1.1597313850 | -0.4882814521 | -0.1972875666 |
|                                  |                            | N                     | -0.3502970023 | -1.1843090571 | -0.7246905498 |
|                                  |                            | C                     | -2.4688602533 | -0.0590746327 | 0.3259863863  |
|                                  |                            | H                     | -2.3617770713 | 0.2148750418  | 1.3833234155  |
|                                  |                            | H                     | -2.8060302911 | 0.8256415975  | -0.2279022601 |
|                                  |                            | H                     | -3.1948318425 | -0.8762476685 | 0.2179646416  |
|                                  |                            | C                     | 1.7741730954  | -0.6991037738 | 0.8531939090  |
|                                  |                            | H                     | 1.0225997268  | -0.4628501435 | 1.6117605342  |
|                                  |                            | H                     | 1.8748754151  | -1.7845072607 | 0.7296173766  |
| H                                | 2.7496843502               | -0.2830022100         | 1.1596040438  |               |               |

## (b) M11-L/MG3S

| Species                         | Absolute energy (hartrees) | Cartesian coordinates |             |             |             |
|---------------------------------|----------------------------|-----------------------|-------------|-------------|-------------|
| <i>syn</i> -CH <sub>3</sub> CHO | -228.92                    | C                     | 0.45794900  | 0.69941000  | -0.00000600 |
|                                 |                            | O                     | -0.77869300 | 0.56788800  | 0.00000100  |
|                                 |                            | O                     | -1.22442600 | -0.67690400 | 0.00000900  |
|                                 |                            | C                     | 1.32708500  | -0.45293000 | -0.00000400 |
|                                 |                            | H                     | 1.07743400  | -1.08729500 | 0.86396800  |
|                                 |                            | H                     | 1.07742600  | -1.08730300 | -0.86396800 |
|                                 |                            | H                     | 2.38225700  | -0.17723700 | -0.00001000 |
|                                 |                            | H                     | 0.77762900  | 1.74508400  | -0.00001200 |
| CH <sub>3</sub> CN              | -132.77                    | C                     | 0.00000000  | 0.00000000  | 0.27418500  |
|                                 |                            | N                     | 0.00000000  | 0.00000000  | 1.41703300  |
|                                 |                            | C                     | 0.00000000  | 0.00000000  | -1.15680700 |
|                                 |                            | H                     | 0.00000000  | -1.02495100 | -1.54116600 |
|                                 |                            | H                     | -0.88763300 | 0.51247500  | -1.54116600 |
|                                 |                            | H                     | 0.88763300  | 0.51247500  | -1.54116600 |
| TS3                             | -361.69                    | C                     | 1.37907100  | -0.07943500 | -0.43565600 |
|                                 |                            | O                     | 0.83174000  | 1.05078900  | -0.57197100 |
|                                 |                            | O                     | -0.10543600 | 1.27086400  | 0.37483900  |
|                                 |                            | H                     | 2.00087200  | -0.32207800 | -1.30825000 |
|                                 |                            | C                     | -1.13836900 | -0.49324900 | -0.21259100 |
|                                 |                            | N                     | -0.32564200 | -1.14565800 | -0.73074800 |
|                                 |                            | C                     | -2.40341400 | -0.06041100 | 0.30737100  |
|                                 |                            | H                     | -2.29694900 | 0.20935700  | 1.36258900  |
|                                 |                            | H                     | -2.73782100 | 0.83446900  | -0.22503300 |
|                                 |                            | H                     | -3.15433300 | -0.85275100 | 0.20693500  |
|                                 |                            | C                     | 1.70196000  | -0.68739700 | 0.85871300  |
|                                 |                            | H                     | 0.94306500  | -0.45112200 | 1.60389100  |
|                                 |                            | H                     | 1.81068100  | -1.76864300 | 0.75312700  |
|                                 |                            | H                     | 2.66805200  | -0.27989900 | 1.19201400  |
| M3                              | -361.77                    | C                     | 1.08007600  | -0.11834500 | -0.42089300 |
|                                 |                            | O                     | 0.69102200  | 1.15864900  | 0.04889200  |
|                                 |                            | O                     | -0.71840200 | 1.12565100  | 0.02432900  |
|                                 |                            | H                     | 1.31009700  | -0.06225900 | -1.51225300 |
|                                 |                            | C                     | -0.99821300 | -0.17224200 | -0.02226100 |
|                                 |                            | N                     | -0.04666500 | -0.95887200 | -0.23067300 |
|                                 |                            | C                     | -2.41617800 | -0.49176500 | 0.15832000  |
|                                 |                            | H                     | -2.76347300 | -0.17038900 | 1.14581300  |
|                                 |                            | H                     | -3.02564400 | 0.03418900  | -0.58429400 |
|                                 |                            | H                     | -2.56393900 | -1.56633600 | 0.05011100  |
|                                 |                            | C                     | 2.29614900  | -0.53049600 | 0.34068600  |
|                                 |                            | H                     | 2.06282700  | -0.62725900 | 1.40624600  |

|  |  |   |            |             |             |
|--|--|---|------------|-------------|-------------|
|  |  | H | 2.65425000 | -1.49507800 | -0.03106100 |
|  |  | H | 3.10057500 | 0.20192000  | 0.21927100  |

Table S18. The reaction classic energy barrier for R1, R2 and R3 reactions.

| Method           | <i>anti</i> -CH <sub>3</sub> CHOO | <i>syn</i> -CH <sub>3</sub> CHOO | CH <sub>3</sub> CN | TS2          | TS3          |
|------------------|-----------------------------------|----------------------------------|--------------------|--------------|--------------|
| W2X <sup>a</sup> | -229.0629212                      | -229.0688175                     | -132.8277606       | -361.8976062 | -361.8941424 |
| W3X-L            | -229.0662375                      | -229.0719358                     | -132.8290367       | -361.9011746 | -361.897677  |

Both W2X and W3X-L are based on DF-CCSD(T)-F12b/jun-cc-pVDZ geometric optimizations.

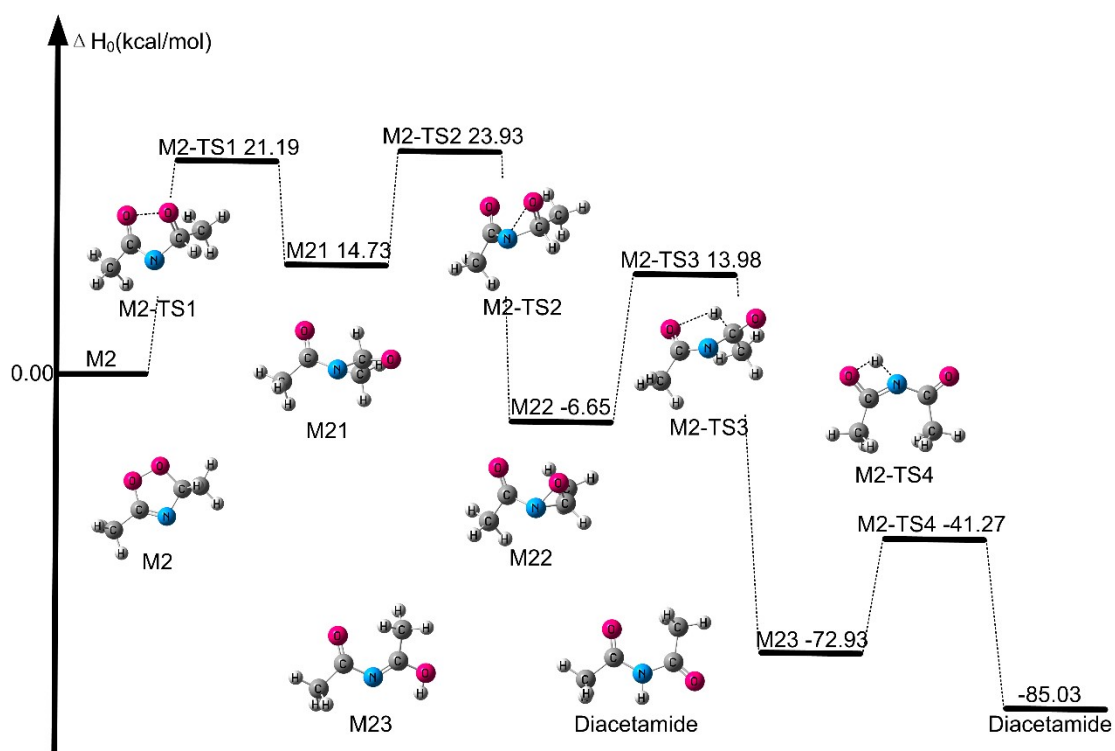

**Figure S1.** The enthalpies profile of the M2 isomerization channels for the *anti*-CH<sub>3</sub>CHOO + CH<sub>3</sub>CN reactions. Values are given for all species as calculated by M11-L/MG3S.

(a)  $\text{CH}_2\text{OO} + \text{CH}_3\text{CN}$ 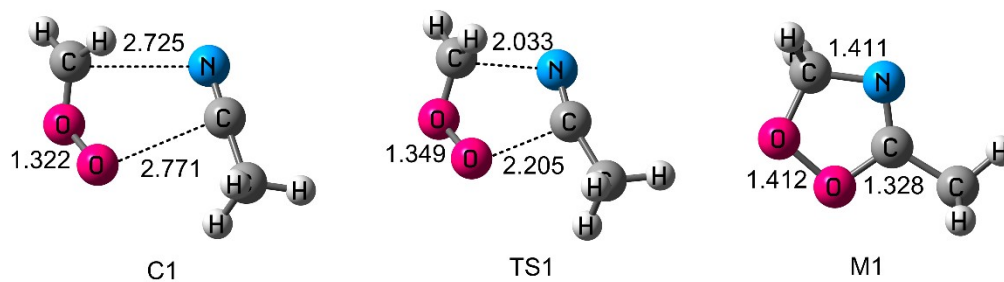(b) *anti*- $\text{CH}_3\text{CHOO} + \text{CH}_3\text{CN}$ 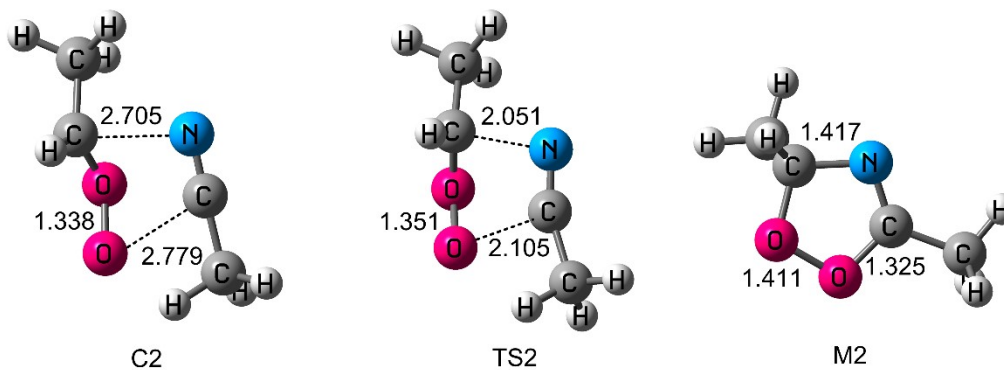(c) *syn*- $\text{CH}_3\text{CHOO} + \text{CH}_3\text{CN}$ 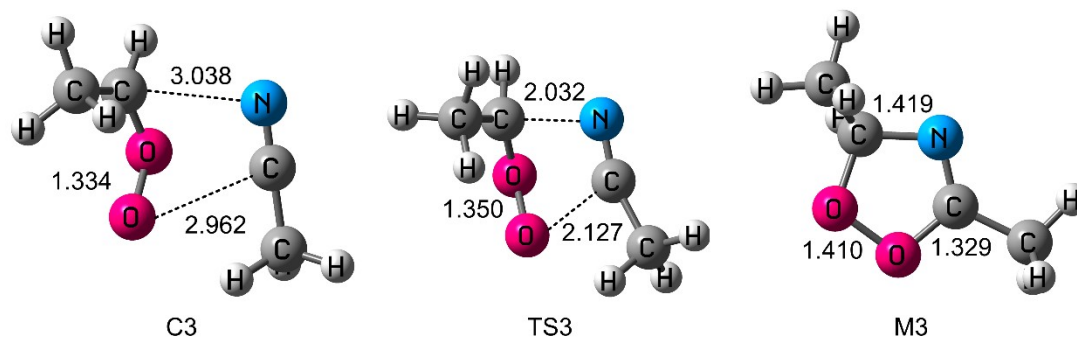**Figure S2.** Optimized M11-L/MG3S geometries for the pre-reactive complex, transition

---

state, and product of the acetonitrile addition to the Criegee intermediates. Distances are given in angstroms (Å).

## References

---

- 1 J. L. Bao, J. Zheng, D. G. Truhlar, *J. Am. Chem. Soc.*, 2016, **138**, 2690-2704.
- 2 J. L. Bao, D. G. Truhlar, *Phys. Chem. Chem. Phys.*, 2016, **18**, 10097-10108.
- 3 J. L. Bao, X. Zhang, D. G. Truhlar, *Phys. Chem. Chem. Phys.*, 2016, **18**, 16659-16670.
- 4 J. L. Bao, D. G. Truhlar, *Phys. Chem. Chem. Phys.*, 2018, **20**, 30475-30479.
- 5 K. T. Kuwata, M. R. Hermes, M. J. Carlson, C. K. Zogg, *J. Phys. Chem. A*, 2010, **114**, 9192-9204.
- 6 T. Berndt, R. Kaethner, J. Voigtländer, F. Stratmann, M. Pfeifle, P. Reichle, M. Sipilä, M. Kulmala, M. Olzmann, *Phys. Chem. Chem. Phys.*, 2015, **17**, 19862-19873.
- 7 F. M. Mourits, F. H. A. Rummens, *Can. J. Chem.*, 1977, **55**, 3007-3020.
